# Supplementary material
Source: MDPI journal article supplement (https://www.mdpi.com/2073-4344/9/3/298)
Supplement: s1 [file s1]

# Supporting Material: Synthesis and Evaluation of Copper Supported Titanium Nanotubes as Electrocatalyst for the Electrochemical Reduction of Carbon Dioxide to Organics

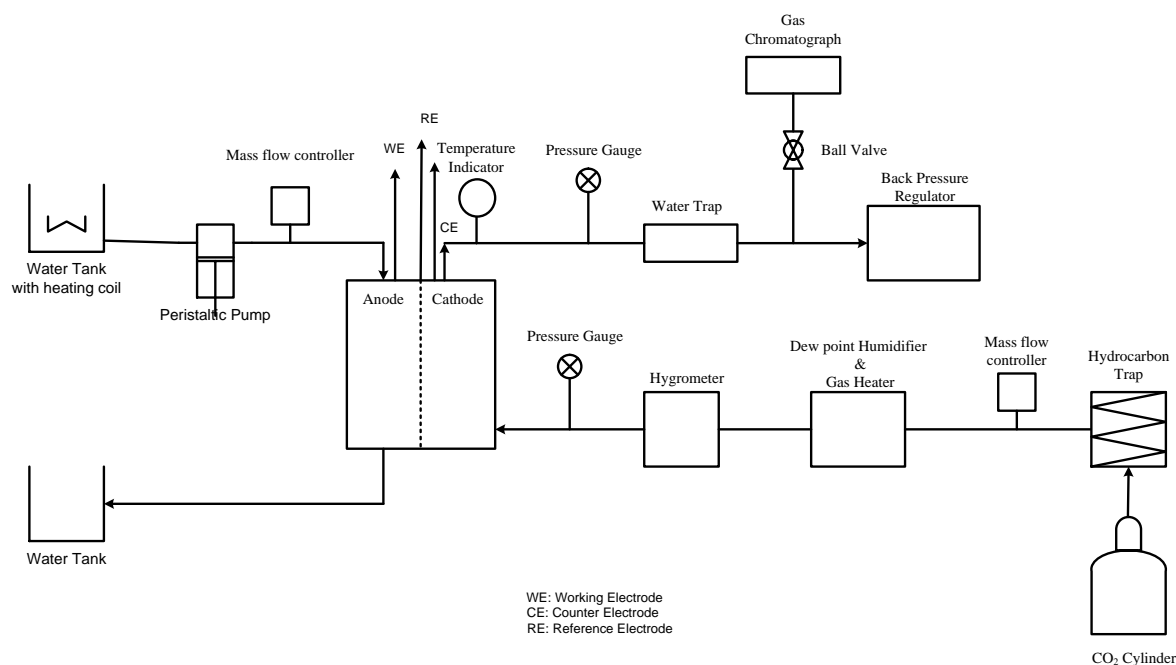

Figure S1: Experimental set-up for continuous SPE reactor system
